# Supplementary material for: Protocol and statistical analysis plan for the mega randomised registry trial comparing conservative vs. liberal oxygenation targets in adults with sepsis in the intensive care unit (Mega-ROX Sepsis)
Source: PubMed Central journal article supplement — Crit Care Resusc. 2023 May 22;25(2):106–12. doi: 10.1016/j.ccrj.2023.04.008 (PMC10581255; doi:10.1016/j.ccrj.2023.04.008), 2023-05-22
Supplement: mmc1.pdf [file mmc1.pdf]

# Proposed presentation of data for Mega-ROX Sepsis

Version 1. 4<sup>th</sup> October 2022

| <b>Table 1:</b> Baseline characteristics                 |                                      |                                 |
|----------------------------------------------------------|--------------------------------------|---------------------------------|
| Characteristic                                           | Conservative oxygen therapy (n=xxxx) | Liberal oxygen therapy (n=xxxx) |
| Age – yr                                                 | xx.x ± xx                            | xx.x ± xx                       |
| Male sex – no. (%)                                       | xxx (xx.x)                           | xxx (xx.x)                      |
| Body mass index                                          | xx.x ± xx                            | xx.x ± xx                       |
| Clinical frailty score                                   | xxx (xx.x)                           | xxx (xx.x)                      |
| Source of admission to ICU – no. (%)                     |                                      |                                 |
| Emergency department                                     | xxx (xx.x)                           | xxx (xx.x)                      |
| Hospital ward                                            | xxx (xx.x)                           | xxx (xx.x)                      |
| Transfer from another ICU                                | xxx (xx.x)                           | xxx (xx.x)                      |
| Transfer from another hospital (except from another ICU) | xxx (xx.x)                           | xxx (xx.x)                      |
| From OT following surgery                                | xxx (xx.x)                           | xxx (xx.x)                      |
| Hours from hospital admission to randomisation           | xx.x ± xx                            | xx.x ± xx                       |
| Hours from ICU admission to randomisation                | xx.x ± xx                            | xx.x ± xx                       |
| APACHE-II score*                                         | xx.x ± xx                            | xx.x ± xx                       |
| SAPS-III score†                                          |                                      |                                 |
| Sepsis source – no. (%)                                  |                                      |                                 |
| Respiratory                                              | xxx (xx.x)                           | xxx (xx.x)                      |
| Gastrointestinal                                         | xxx (xx.x)                           | xxx (xx.x)                      |
| Genitourinary                                            | xxx (xx.x)                           | xxx (xx.x)                      |
| Musculoskeletal and skin                                 | xxx (xx.x)                           | xxx (xx.x)                      |
| Other                                                    | xxx (xx.x)                           | xxx (xx.x)                      |
| COVID-19 – no. (%)                                       | xxx (xx.x)                           | xxx (xx.x)                      |
| Baseline oxygen data                                     |                                      |                                 |
| FiO <sub>2</sub>                                         | xx.x ± xx                            | xx.x ± xx                       |
| PaO <sub>2</sub> – mmHg                                  | xx.x ± xx                            | xx.x ± xx                       |
| PaO <sub>2</sub> /FiO <sub>2</sub> ratio – mmHg          | xx.x ± xx                            | xx.x ± xx                       |

Plus-minus values will be expressed as mean ± SD (where the distribution of the data is not normal, median [IQR] will be reported instead of mean ± SD). To facilitate meaningful interpretation of categorical variables, categories with small numbers (<10) will be collapsed for analysis.

\* Scores on the APACHE II range from 0 to 71, with higher scores indicating more severe disease and a higher risk of death.

† Scores on the SAPS-III range from 0 to 217, with higher scores indicating more severe disease. The SAPS-III score was collected from trial participants from Brazil.

Abbreviations: APACHE: Acute Physiology And Chronic Health Evaluation; CNS: Central Nervous System; ICU: Intensive Care Unit; OT: operating theatre; SpO<sub>2</sub>: arterial oxygen saturation on pulse oximetry; PaO<sub>2</sub>: arterial partial pressure of oxygen; FiO<sub>2</sub>: fraction of inspired oxygen; PaCO<sub>2</sub>: arterial partial pressure of carbon dioxide; PEEP: positive end expiratory pressure.

**Table 2:** Oxygen exposure by treatment group

| Oxygen exposure metric – n (%)                                               | Conservative oxygen therapy (n=xxx) | Liberal oxygen therapy (n=xxx) | Between-Group difference (95% CI) |
|------------------------------------------------------------------------------|-------------------------------------|--------------------------------|-----------------------------------|
| Median [IQR] percentage of hours per patient SpO <sub>2</sub> ≥97%           | xx (xx-xx)                          | xx (xx-xx)                     | xx (xx to xx)                     |
| Median [IQR] number of hours per patient SpO <sub>2</sub> ≥97%               | xx (xx.x)                           | xx (xx.x)                      | xx (xx to xx)                     |
| Median [IQR] percentage of hours per patient SpO <sub>2</sub> <88%           | xx (xx-xx)                          | xx (xx-xx)                     | xx (xx to xx)                     |
| Median [IQR] number of hours per patient SpO <sub>2</sub> <88%               | xx (xx-xx)                          | xx (xx-xx)                     | xx (xx to xx)                     |
| Proportion of patients with at least one PaO <sub>2</sub> recording <60mmHg  | xx (xx-xx)                          | xx (xx-xx)                     | xx (xx to xx)                     |
| Proportion of patients with at least one PaO <sub>2</sub> recording >100mmHg | xx (xx.x)                           | xx (xx.x)                      | xx (xx to xx)                     |
| Median [IQR] percentage of hours per patient FIO <sub>2</sub> 0.21           | xx (xx.x)                           | xx (xx.x)                      | xx (xx to xx)                     |
| Median [IQR] number of hours per patient FIO <sub>2</sub> 0.21               | xx (xx.x)                           | xx (xx.x)                      | xx (xx to xx)                     |

Abbreviations: IQR: Interquartile range; CI: Confidence Interval

**Table 3:** Outcomes

|                                                                | Conservative oxygen therapy (n=xxxxx) | Liberal oxygen therapy (n=xxxxx) | Estimate (95% CI)                                                                |
|----------------------------------------------------------------|---------------------------------------|----------------------------------|----------------------------------------------------------------------------------|
| <b>Primary outcome*</b>                                        |                                       |                                  |                                                                                  |
| Died at the hospital by day 90- no. (%)                        | xxxx (xx.x)                           | xxxx (xx.x)                      | <b>Relative risk</b><br>xx (xx to xx)<br><b>Risk difference</b><br>xx (xx to xx) |
| <b>Secondary outcomes</b>                                      |                                       |                                  |                                                                                  |
| Hours until removed alive from invasive mechanical ventilation |                                       |                                  | <b>Subhazard ratio of time to extubation‡</b>                                    |
| Number of patients                                             | xxxxx                                 | xxxxx                            |                                                                                  |
| Median (IQR)†                                                  | xx (xx-xx)                            | xx (xx-xx)                       | xx (xx to xx)                                                                    |
| Days until discharged alive from ICU                           |                                       |                                  | <b>Subhazard ratio of time to ICU discharge‡</b>                                 |
| Number of patients                                             | xxxxx                                 | xxxxx                            |                                                                                  |
| Median (IQR)†                                                  | xx (xx-xx)                            | xx (xx-xx)                       | xx (xx to xx)                                                                    |
| Days until discharged alive from hospital                      |                                       |                                  | <b>Subhazard ratio of time to Hospital discharge‡</b>                            |
| Number of patients                                             | xxxxx                                 | xxxxx                            |                                                                                  |
| Median (IQR)†                                                  | xx (xx-xx)                            | xx (xx-xx)                       | xx (xx to xx)                                                                    |
| Discharged home- no. (%)                                       | xxxxx (xx.x)                          | xxxxx (xx.x)                     | <b>Relative risk</b><br>xx (xx to xx)<br><b>Risk difference</b><br>xx (xx to xx) |
| Day-90 mortality- no. (%)                                      | xxxx (xx.x)                           | xxxx (xx.x)                      | <b>Relative risk</b><br>xx (xx to xx)<br><b>Risk difference</b><br>xx (xx to xx) |

Abbreviations: IQR: Interquartile range; CI: Confidence Interval

\* A P-value for the primary outcome comparison will be shown in a footnote. The absolute difference in 90 day mortality and corresponding relative risk will be adjusting for site and for the presence or absence of each of the following at randomisation: suspected hypoxic ischaemic encephalopathy following resuscitation from a cardiac arrest, and acute brain pathologies other than hypoxic ischaemic encephalopathy.

† Duration of invasive mechanical ventilation and ICU and hospital length of stay will be calculated from cumulative incidence functions with mortality regarded as a competing risk.

‡ Ratios of median time to discharge (or extubation) will be estimated using censored linear regression with logarithm of time to discharge (or extubation) as the dependent variable. Adjustment will be made for the same variables as for the primary outcome.

**Table S1: Causes of respiratory sepsis\***

| <b>Sepsis source</b>                              | <b>Conservative oxygen therapy (n=xxxx)</b> | <b>Liberal oxygen therapy (n=xxxx)</b> |
|---------------------------------------------------|---------------------------------------------|----------------------------------------|
| Respiratory sepsis – n (%)                        | xxx (xx.x)                                  | xxx (xx.x)                             |
| Respiratory sinus infection                       | xxx (xx.x)                                  | xxx (xx.x)                             |
| Tonsil or pharyngeal infection                    | xxx (xx.x)                                  | xxx (xx.x)                             |
| Epiglottitis                                      | xxx (xx.x)                                  | xxx (xx.x)                             |
| Pertussis                                         | xxx (xx.x)                                  | xxx (xx.x)                             |
| Croup or laryngotracheobronchitis (non-influenza) | xxx (xx.x)                                  | xxx (xx.x)                             |
| Acute bronchitis, non-influenza                   | xxx (xx.x)                                  | xxx (xx.x)                             |
| Infective exacerbation of COPD                    | xxx (xx.x)                                  | xxx (xx.x)                             |
| Bronchiectasis                                    | xxx (xx.x)                                  | xxx (xx.x)                             |
| Bacterial pneumonia                               | xxx (xx.x)                                  | xxx (xx.x)                             |
| Viral pneumonia, non-influenza (include COVID-19) | xxx (xx.x)                                  | xxx (xx.x)                             |
| Influenza                                         | xxx (xx.x)                                  | xxx (xx.x)                             |
| Fungal or yeast pneumonia                         | xxx (xx.x)                                  | xxx (xx.x)                             |
| Parasitic pneumonia                               | xxx (xx.x)                                  | xxx (xx.x)                             |
| Pneumonia, no organism isolated                   | xxx (xx.x)                                  | xxx (xx.x)                             |
| Lung abscess                                      | xxx (xx.x)                                  | xxx (xx.x)                             |
| Tuberculosis                                      | xxx (xx.x)                                  | xxx (xx.x)                             |
| Empyema or infected effusion                      | xxx (xx.x)                                  | xxx (xx.x)                             |
| Pleurisy                                          | xxx (xx.x)                                  | xxx (xx.x)                             |

\* Where it is logical to combine categories, those with small numbers may be collapsed for simplicity. Categories that do not apply (i.e. those with no patients) will not be shown.

Abbreviations: COPD: chronic obstructive pulmonary disease; COVID-19: coronavirus disease 2019.

**Table S2: Causes of gastrointestinal sepsis\***

| Characteristic                                 | Conservative oxygen therapy (n=xxxx) | Liberal oxygen therapy (n=xxxx) |
|------------------------------------------------|--------------------------------------|---------------------------------|
| Gastrointestinal sepsis – n (%)                | xxx (xx.x)                           | xxx (xx.x)                      |
| Infective oesophagitis                         | xxx (xx.x)                           | xxx (xx.x)                      |
| Infective enteritides                          | xxx (xx.x)                           | xxx (xx.x)                      |
| Necrotising enterocolitis                      | xxx (xx.x)                           | xxx (xx.x)                      |
| Appendicitis or appendiceal abscess            | xxx (xx.x)                           | xxx (xx.x)                      |
| Diverticulitis or diverticular abscess         | xxx (xx.x)                           | xxx (xx.x)                      |
| Infective colitis or proctocolitis             | xxx (xx.x)                           | xxx (xx.x)                      |
| Infective hepatitis                            | xxx (xx.x)                           | xxx (xx.x)                      |
| Infective cholangitis                          | xxx (xx.x)                           | xxx (xx.x)                      |
| Hepatic abscess                                | xxx (xx.x)                           | xxx (xx.x)                      |
| Hydatid disease                                | xxx (xx.x)                           | xxx (xx.x)                      |
| Acute cholecystitis or empyema of gall bladder | xxx (xx.x)                           | xxx (xx.x)                      |
| Gangrenous gall bladder                        | xxx (xx.x)                           | xxx (xx.x)                      |
| Pancreatic abscess or infected pseudocyst      | xxx (xx.x)                           | xxx (xx.x)                      |
| Infective pancreatitis                         | xxx (xx.x)                           | xxx (xx.x)                      |
| Primary peritonitis                            | xxx (xx.x)                           | xxx (xx.x)                      |
| Intra-peritoneal abscess (not pelvic)          | xxx (xx.x)                           | xxx (xx.x)                      |
| CAPD related peritonitis                       | xxx (xx.x)                           | xxx (xx.x)                      |
| Pelvic infection or abscess                    | xxx (xx.x)                           | xxx (xx.x)                      |
| Retroperitoneal abscess or infection           | xxx (xx.x)                           | xxx (xx.x)                      |
| Tuberculous peritonitis                        | xxx (xx.x)                           | xxx (xx.x)                      |

\* Where it is logical to combine categories, those with small numbers may be collapsed for simplicity. Categories that do not apply (i.e. those with no patients) will not be shown. Abbreviations: CAPD: continuous ambulatory peritoneal dialysis.

**Table S3: Causes of genitourinary sepsis\***

| <b>Characteristic</b>                     | <b>Conservative oxygen therapy (n=xxxx)</b> | <b>Liberal oxygen therapy (n=xxxx)</b> |
|-------------------------------------------|---------------------------------------------|----------------------------------------|
| Genitourinary sepsis – n (%)              | xxx (xx.x)                                  | xxx (xx.x)                             |
| Pyelonephritis or pyonephrosis            | xxx (xx.x)                                  | xxx (xx.x)                             |
| Perinephric abscess                       | xxx (xx.x)                                  | xxx (xx.x)                             |
| Cystitis, pyocystis or urethritis         | xxx (xx.x)                                  | xxx (xx.x)                             |
| Uterine cavity infection                  | xxx (xx.x)                                  | xxx (xx.x)                             |
| Pelvic infection or abscess               | xxx (xx.x)                                  | xxx (xx.x)                             |
| Toxic shock syndrome                      | xxx (xx.x)                                  | xxx (xx.x)                             |
| Tubo-ovarian abscess                      | xxx (xx.x)                                  | xxx (xx.x)                             |
| Amnionitis                                | xxx (xx.x)                                  | xxx (xx.x)                             |
| Infected retained products of conception  | xxx (xx.x)                                  | xxx (xx.x)                             |
| Septic abortion                           | xxx (xx.x)                                  | xxx (xx.x)                             |
| Prostatitis                               | xxx (xx.x)                                  | xxx (xx.x)                             |
| Testicular, prostatatic or penile abscess | xxx (xx.x)                                  | xxx (xx.x)                             |

\* Where it is logical to combine categories, those with small numbers may be collapsed for simplicity. Categories that do not apply (i.e. those with no patients) will not be shown.

**Table S4: Causes of musculoskeletal and skin sepsis\***

| <b>Characteristic</b>                     | <b>Conservative oxygen therapy (n=xxxx)</b> | <b>Liberal oxygen therapy (n=xxxx)</b> |
|-------------------------------------------|---------------------------------------------|----------------------------------------|
| Musculoskeletal and skin sepsis – n (%)   | xxx (xx.x)                                  | xxx (xx.x)                             |
| Discitis                                  | xxx (xx.x)                                  | xxx (xx.x)                             |
| Spinal osteomyelitis or vertebral abscess | xxx (xx.x)                                  | xxx (xx.x)                             |
| Osteomyelitis of the pelvis or long bones | xxx (xx.x)                                  | xxx (xx.x)                             |
| Infective arthritis                       | xxx (xx.x)                                  | xxx (xx.x)                             |
| Infected joint prosthesis                 | xxx (xx.x)                                  | xxx (xx.x)                             |
| Myositis                                  | xxx (xx.x)                                  | xxx (xx.x)                             |
| Necrotising fasciitis                     | xxx (xx.x)                                  | xxx (xx.x)                             |
| Rhabdomyolysis                            | xxx (xx.x)                                  | xxx (xx.x)                             |
| Muscle or connective tissue abscess       | xxx (xx.x)                                  | xxx (xx.x)                             |
| Fournier's gangrene of abdominal wall     | xxx (xx.x)                                  | xxx (xx.x)                             |
| Fournier's gangrene of perineal tissues   | xxx (xx.x)                                  | xxx (xx.x)                             |
| Sternotomy related infection              | xxx (xx.x)                                  | xxx (xx.x)                             |
| Device related abdominal wall infection   | xxx (xx.x)                                  | xxx (xx.x)                             |
| Cutaneous cellulitis                      | xxx (xx.x)                                  | xxx (xx.x)                             |
| Pressure injury, ulcers or sores          | xxx (xx.x)                                  | xxx (xx.x)                             |

\* Where it is logical to combine categories, those with small numbers may be collapsed for simplicity. Categories that do not apply (i.e. those with no patients) will not be shown.

| <b>Table S5: Other causes of sepsis*</b>                                                                 |                                             |                                        |
|----------------------------------------------------------------------------------------------------------|---------------------------------------------|----------------------------------------|
| <b>Characteristic</b>                                                                                    | <b>Conservative oxygen therapy (n=xxxx)</b> | <b>Liberal oxygen therapy (n=xxxx)</b> |
| Infection present but not specified as the primary reason for ICU admission – n (%)                      | xxx (xx.x)                                  | xxx (xx.x)                             |
| Cardiovascular system sepsis – n (%)                                                                     | xxx (xx.x)                                  | xxx (xx.x)                             |
| Viral or bacterial cardiomyopathy                                                                        | xxx (xx.x)                                  | xxx (xx.x)                             |
| Myocardial or septal abscess                                                                             | xxx (xx.x)                                  | xxx (xx.x)                             |
| Myocarditis                                                                                              | xxx (xx.x)                                  | xxx (xx.x)                             |
| Non-valvular endocarditis                                                                                | xxx (xx.x)                                  | xxx (xx.x)                             |
| Infective pericarditis                                                                                   | xxx (xx.x)                                  | xxx (xx.x)                             |
| Endocarditis, aortic root abscess, prosthetic heart valve infection, infected thoracic aortic prosthesis | xxx (xx.x)                                  | xxx (xx.x)                             |
| Infected artificial pacemaker                                                                            | xxx (xx.x)                                  | xxx (xx.x)                             |
| Syphilitic aortitis                                                                                      | xxx (xx.x)                                  | xxx (xx.x)                             |
| Infected thrombophlebitis of the great veins                                                             | xxx (xx.x)                                  | xxx (xx.x)                             |
| Infected intravenous catheter in the great veins                                                         | xxx (xx.x)                                  | xxx (xx.x)                             |
| Infected thrombophlebitis of the peripheral veins                                                        | xxx (xx.x)                                  | xxx (xx.x)                             |
| Infected intravenous catheter in the peripheral veins                                                    | xxx (xx.x)                                  | xxx (xx.x)                             |
| Infected arterio-venous shunt or fistula                                                                 | xxx (xx.x)                                  | xxx (xx.x)                             |
| Infected abdominal aortic prosthesis                                                                     | xxx (xx.x)                                  | xxx (xx.x)                             |
| Infected iliac prosthesis                                                                                | xxx (xx.x)                                  | xxx (xx.x)                             |
| Neurological system sepsis – n (%)                                                                       | xxx (xx.x)                                  | xxx (xx.x)                             |
| Meningitis, unspecified                                                                                  | xxx (xx.x)                                  | xxx (xx.x)                             |
| Encephalitis                                                                                             | xxx (xx.x)                                  | xxx (xx.x)                             |
| Intracranial abscess                                                                                     | xxx (xx.x)                                  | xxx (xx.x)                             |
| Infected CSF shunt                                                                                       | xxx (xx.x)                                  | xxx (xx.x)                             |
| Meningococcal meningitis                                                                                 | xxx (xx.x)                                  | xxx (xx.x)                             |
| Bacterial meningitis, not meningococcal                                                                  | xxx (xx.x)                                  | xxx (xx.x)                             |
| Viral meningitis                                                                                         | xxx (xx.x)                                  | xxx (xx.x)                             |
| Tuberculous meningitis                                                                                   | xxx (xx.x)                                  | xxx (xx.x)                             |
| Epidural or subdural spinal infection                                                                    | xxx (xx.x)                                  | xxx (xx.x)                             |
| Poliomyelitis                                                                                            | xxx (xx.x)                                  | xxx (xx.x)                             |
| Tetanus                                                                                                  | xxx (xx.x)                                  | xxx (xx.x)                             |
| Infective polyneuropathy                                                                                 | xxx (xx.x)                                  | xxx (xx.x)                             |
| Leprosy                                                                                                  | xxx (xx.x)                                  | xxx (xx.x)                             |
| Botulism                                                                                                 | xxx (xx.x)                                  | xxx (xx.x)                             |
| Miscellaneous sepsis – n (%)                                                                             | xxx (xx.x)                                  | xxx (xx.x)                             |
| Leishmaniasis                                                                                            | xxx (xx.x)                                  | xxx (xx.x)                             |
| Malaria                                                                                                  | xxx (xx.x)                                  | xxx (xx.x)                             |
| HIV                                                                                                      | xxx (xx.x)                                  | xxx (xx.x)                             |
| Septicaemia                                                                                              | xxx (xx.x)                                  | xxx (xx.x)                             |
| Mononucleosis                                                                                            | xxx (xx.x)                                  | xxx (xx.x)                             |
| Leptospirosis                                                                                            | xxx (xx.x)                                  | xxx (xx.x)                             |
| Mediastinitis                                                                                            | xxx (xx.x)                                  | xxx (xx.x)                             |
| Mandible, facial bones, dental or salivary infection                                                     | xxx (xx.x)                                  | xxx (xx.x)                             |
| Orbital cellulitis                                                                                       | xxx (xx.x)                                  | xxx (xx.x)                             |
| Mastoid infection                                                                                        | xxx (xx.x)                                  | xxx (xx.x)                             |

\* Where it is logical to combine categories, those with small numbers may be collapsed for simplicity. Categories that do not apply (i.e. those with no patients) will not be shown.



## **FIGURES:**

**Figure 1:** Participant flow diagram

Description: Participant flow diagram.

**Figure 2A:** Kaplan-Meier survival estimates of the probably of survival to day 90

Description: Line graph with days 0 to 90 on the horizontal axis and probability of survival on the vertical axis.

**Figure 2B:** Forest plot for subgroup treatment effects on mortality: respiratory sepsis vs. gastrointestinal sepsis vs. genitourinary sepsis vs. other source of sepsis.

## SUPPLEMENTAL FIGURES:

### **Figure S1A:** Mean FiO<sub>2</sub> by treatment group

Description: Line graph with days 0 to 7 on the horizontal axis and FiO<sub>2</sub> on the vertical axis with mean daily FiO<sub>2</sub> shown by treatment group. The number of observations by group on each day will be indicated on the horizontal axis. The mean daily FiO<sub>2</sub> will be calculated from recordings of FiO<sub>2</sub> taken six hourly while the patient is invasively ventilated in the ICU up until day 7. Data points will be reported with corresponding standard error bars.

### **Figure S1B:** Highest FiO<sub>2</sub> by treatment group

Description: Line graph with days 0 to 7 on the horizontal axis and FiO<sub>2</sub> on the vertical axis with the highest daily FiO<sub>2</sub> shown by treatment group. The number of observations by group on each day will be indicated on the horizontal axis. Highest FiO<sub>2</sub> will be recorded daily while the patient is invasively ventilated in ICU up until day 7. Data points will be reported with corresponding standard error bars.

### **Figure S1C:** Lowest FiO<sub>2</sub> by treatment group

Description: Line graph with days 0 to 7 on the horizontal axis and FiO<sub>2</sub> on the vertical axis with the lowest daily FiO<sub>2</sub> shown by treatment group. The number of observations by group on each day will be indicated on the horizontal axis. Lowest FiO<sub>2</sub> will be recorded daily while the patient is invasively ventilated in ICU up until day 7. Data points will be reported with corresponding standard error bars.

### **Figure S2A:** Mean daily PaO<sub>2</sub> by treatment group

Description: Line graph with days 0 to 7 on the horizontal axis and PaO<sub>2</sub> on the vertical axis with mean daily PaO<sub>2</sub> shown by treatment group. The number of observations by group on each day will be indicated on the horizontal axis. The mean daily PaO<sub>2</sub> will be calculated from recordings of PaO<sub>2</sub> taken six hourly while the patient is in the ICU up until day 7. Data points will be reported with corresponding standard error bars.

### **Figure S2B:** Highest daily PaO<sub>2</sub> by treatment group

Description: Line graph with days 0 to 7 on the horizontal axis and PaO<sub>2</sub> on the vertical axis with the highest daily PaO<sub>2</sub> shown by treatment group. The number of observations by group on each day will be indicated on the horizontal axis. Highest PaO<sub>2</sub> will be recorded daily while the patient is in ICU up until day 7. Data points will be reported with corresponding standard error bars.

### **Figure S2C:** Lowest PaO<sub>2</sub> by treatment group

Description: Line graph with days 0 to 7 on the horizontal axis and PaO<sub>2</sub> on the vertical axis with the lowest daily PaO<sub>2</sub> shown by treatment group. The number of observations by group on each day will be indicated on the horizontal axis. Lowest PaO<sub>2</sub> will be recorded daily while the patient is in ICU up until day 7. Data points will be reported with corresponding standard error bars.
